# Supplementary material for: Family Meals, Conviviality, and the Mediterranean Diet among Families with Adolescents
Source: PubMed Central journal article supplement (PMC7967627; doi:10.3390/ijerph18052499), 2021-03-03
Supplement: ijerph-18-02499-s001.pdf [file ijerph-18-02499-s001.pdf]

## Supplementary Material

**Table S1.** Parents' interview topics and questions.

| Topics                     | Questions                                                                                              |
|----------------------------|--------------------------------------------------------------------------------------------------------|
| Family activities          | What is the family's daily routine?                                                                    |
|                            | What meals do you usually have as a family?                                                            |
| Location of family meals   | Where are family meals usually eaten?                                                                  |
|                            | Is the location the same when it is a non-family meal?                                                 |
| Importance of family meals | Do you think family meals are important? Why?                                                          |
| Use of technology          | What do you think about the use of screens (TV, tablets, mobile phones) at family mealtimes?           |
|                            | Is the use of screens allowed during family meals? Why/Why not?                                        |
|                            | Is the use of screens allowed when it is a non-family meal? Why/Why not?                               |
| Conversations              | What do you usually talk about at family meals?                                                        |
|                            | How or who usually starts these conversations?                                                         |
|                            | How important are these conversations to you?                                                          |
| Meal organization          | Who cooks the family meals? Why/Why not?                                                               |
|                            | How do you decide what to eat?                                                                         |
|                            | How do you ensure the food is ready at mealtimes?                                                      |
|                            | Do you have an assigned place at the table for meals? Why/Why not?                                     |
|                            | How and who serves up the food?                                                                        |
|                            | Are there any rules for mealtimes? For example, not getting up until everyone has finished.            |
| Dietary habits             | Is there a difference between the time spent on having family and non-family meals? Why?               |
|                            | Describe a typical family meal menu.                                                                   |
|                            | How does the menu change if the meal is a non-family meal? Do the amounts of food change as well? Why? |
|                            | How do you think family meals affect how and what you eat?                                             |
|                            | How do you think family meals affect your children's food preferences?                                 |
|                            | Are there different food preferences? Does everyone eat the same thing? Why?                           |
|                            | How do you think different food preferences affect the preparation and organization of family meals?   |

**Table S2.** Mediterranean diet pyramid score.

| Items                            | Sub-items                               | Score |
|----------------------------------|-----------------------------------------|-------|
| Priority water consumption       | Priority water consumption              | 1     |
|                                  | No priority water consumption           | 0     |
| Fruit at each main meal          | Fruit at each main meal                 | 2     |
|                                  | Fruit at one meal                       | 1     |
|                                  | Fruit at no meal                        | 0     |
| Vegetables at each main meal     | Vegetables at each main meal            | 2     |
|                                  | Vegetables at one meal                  | 1     |
|                                  | Vegetables at no meal                   | 0     |
| Cereals at each main meal        | Cereals at each main meal               | 2     |
|                                  | Cereals at one meal                     | 1     |
|                                  | Cereals at no meal                      | 0     |
| Priority whole grain consumption | Priority whole grain consumption        | 1     |
|                                  | No priority whole grain consumption     | 0     |
| Priority olive oil consumption   | Priority olive oil consumption          | 1     |
|                                  | No priority olive oil consumption       | 0     |
| Seasoning with spices and garlic | Seasoning with spices and garlic        | 1     |
|                                  | No seasoning with spices and garlic     | 0     |
| Nut consumption                  | 1 handful of nuts daily                 | 3     |
|                                  | 4-6 handfuls of nuts weekly             | 2     |
|                                  | 1-3 handfuls of nuts weekly             | 1     |
|                                  | No consumption of nuts                  | 0     |
| Dairy consumption                | 2 portions of dairy daily               | 2     |
|                                  | 1 portion of dairy daily                | 1     |
|                                  | No consumption of dairy                 | 0     |
| Fish and seafood consumption     | > 2 portions of fish and seafood weekly | 2     |
|                                  | 1 portion of fish and seafood weekly    | 1     |
|                                  | No consumption of fish and seafood      | 0     |
| White meat consumption           | 2 portions of white meat weekly         | 2     |

|                                       |                                            |               |
|---------------------------------------|--------------------------------------------|---------------|
|                                       | 1 portion of white meat weekly             | 1             |
|                                       | No consumption of white meat               | 0             |
| Legume consumption                    | > 2 portions of legumes weekly             | 2             |
|                                       | 1 portion of legumes weekly                | 1             |
|                                       | No consumption of legumes                  | 0             |
| Egg consumption                       | 3 portions of eggs weekly                  | 3             |
|                                       | 2 portions of eggs weekly                  | 2             |
|                                       | 1 portion of eggs weekly                   | 1             |
|                                       | No consumption of eggs                     | 0             |
| Processed meat consumption            | No consumption of processed meat           | 3             |
|                                       | 1 portion of processed meat weekly         | 2             |
|                                       | 2 portions of processed meat weekly        | 1             |
|                                       | > 3 portions of processed meat weekly      | 0             |
| Red meat consumption                  | < 2 portions of red meat weekly            | 2             |
|                                       | 3 portions of red meat weekly              | 1             |
|                                       | > 4 portions of red meat weekly            | 0             |
| Potato consumption                    | ≤ 2 portions of potatoes weekly            | 2             |
|                                       | 3 portions of potatoes weekly              | 1             |
|                                       | > 4 portions of potatoes weekly            | 0             |
| Pastry and sweet consumption          | No consumption of pastries and sweets      | 3             |
|                                       | 1 portion of pastries and sweets weekly    | 2             |
|                                       | 2 portions of pastries and sweets weekly   | 1             |
|                                       | > 3 portions of pastries and sweets weekly | 0             |
| Home-cooked food                      | High consumption of home-cooked food       | 3             |
|                                       | Medium consumption of home-cooked food     | 2             |
|                                       | Low consumption of home-cooked food        | 1             |
|                                       | No consumption of home-cooked food         | 0             |
| Prioritization of family meals        | Prioritization of family meals             | 2             |
|                                       | Some prioritization of family meals        | 1             |
|                                       | No prioritization of family meals          | 0             |
| <b>Classification according score</b> |                                            | <b>Points</b> |
| Very low Mediterranean diet adherence |                                            | 0–12          |
| Low Mediterranean diet adherence      |                                            | 13–26         |
| High Mediterranean diet adherence*    |                                            | 27–39         |

\*Two subcategories were developed to further stratify high adherence families: “very optimal adherence” (39–31) and “optimal adherence” (30–27).

**Table S3.** Results of Mediterranean diet adherence scores.

| <i>MD adherence scores</i>                  | <i>Family identification number</i> |    |    |    |    |    |    |    |    |    |    |    |
|---------------------------------------------|-------------------------------------|----|----|----|----|----|----|----|----|----|----|----|
|                                             | 01                                  | 02 | 03 | 04 | 05 | 06 | 07 | 08 | 09 | 10 | 11 | 12 |
| <i>Mediterranean diet pyramid score (1)</i> | 32                                  | 22 | 26 | 34 | 28 | 30 | 31 | 26 | 29 | 30 | 32 | 29 |
| <i>MEDAS* (2)</i>                           | 11                                  | 7  | 9  | 13 | 10 | 10 | 10 | 9  | 10 | 11 | 11 | 11 |

- (1). Source: FFQ. Supplementary Table 2 describes how the Mediterranean diet pyramid score was built and its categories.  
(2). Source: FFQ \* Schröder, H.; Fitó, M.; Estruch, R. A Short Screener Is Valid for Assessing Mediterranean Diet Adherence among Older Spanish Men and Women. *J. Nutr.* **2011**, *141* (6), 1140–1145. MEDAS: Mediterranean diet adherence screener.

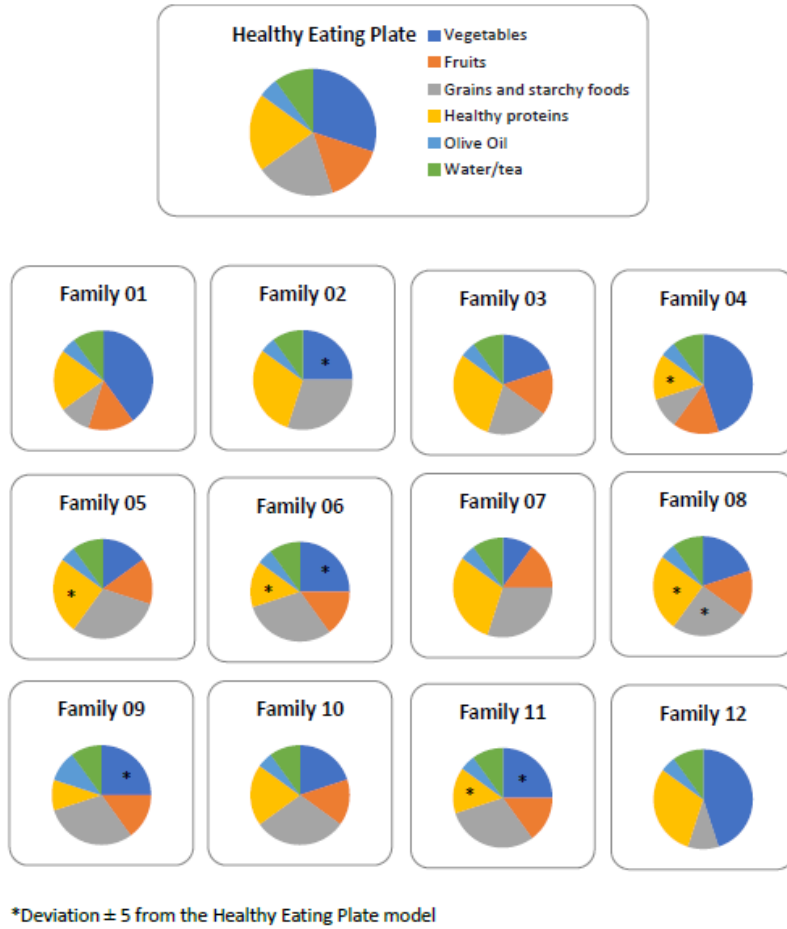

**Figure S1.** Composition of the interviewed families' dinners in comparison to the Harvard Healthy Eating Plate (*The Healthy Eating Plate. Harvard University, 2011*).
